# Supplementary material for: Three novel polyoxoanion-supported compounds: confinement of polyoxoanions in Ni-containing rigid concave surfaces with enhanced NLO properties
Source: Royal Society of Chemistry journal article supplement (doi:10.1039/c5dt02710a), 2015-01-01
Supplement: c5dt02710a1.pdf [file c5dt02710a1.pdf]

## Supporting Information

### Three novel polyoxoanion-supported compounds: confinement of polyoxoanions in Ni-containing rigid concave surfaces with enhanced NLO properties

Yayu Dong, [a] Xiao Xu, [a] Guangpeng Zhou\*, [b] Hao Miao, [a] Gonghao Hu, [a] and Yan Xu \*[a,c]

<sup>a</sup>College of Chemistry and Chemical Engineering, State Key Laboratory of Materials-Oriented Chemical Engineering, Nanjing Tech University, Nanjing 210009, PR China. E-mail: yanxu@njtech.edu.cn

<sup>b</sup> College of Chemistry and Chemical Engineering, Chongqing University of Technology, Chongqing 400054, P. R. China. E-mail: gpzhou@cqu.edu.cn

<sup>c</sup>Coordination Chemistry Institute, State Key Laboratory of Coordination Chemistry, Nanjing University, Nanjing 210093, PR China

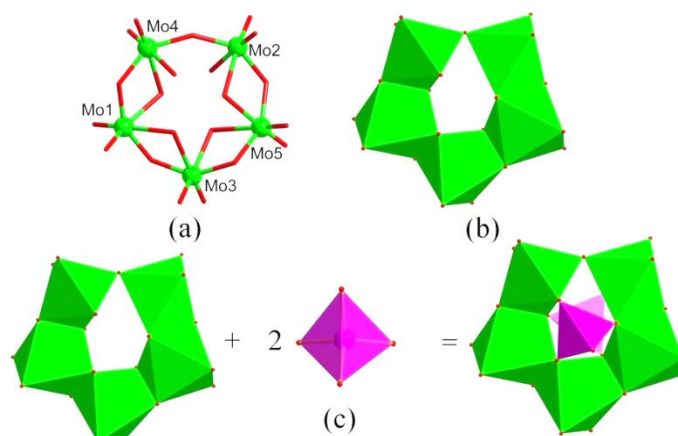

Figure S1. (a) and (b) The pentagon formed by five MoO<sub>6</sub> through sharing angles and edges; (c) The schematic diagram of the formation of [H<sub>2</sub>P<sub>2</sub>Mo<sub>5</sub>O<sub>23</sub>]<sup>4-</sup>.

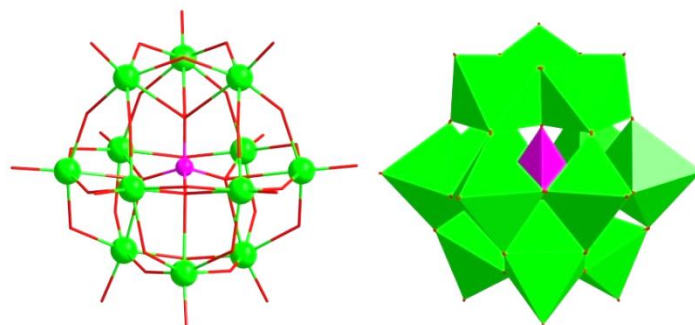

Figure S2. The [PMo<sub>11</sub><sup>VI</sup>Mo<sup>V</sup>O<sub>40</sub>]<sup>4-</sup> cluster in compound **2** Color code: bright green; Mo, pink; P.

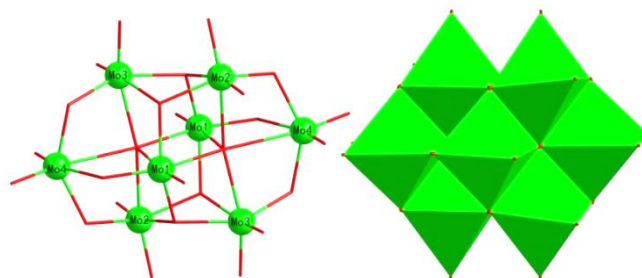

Figure S3. The [Mo<sub>8</sub>O<sub>26</sub>]<sup>4-</sup> cluster in compound **3**.

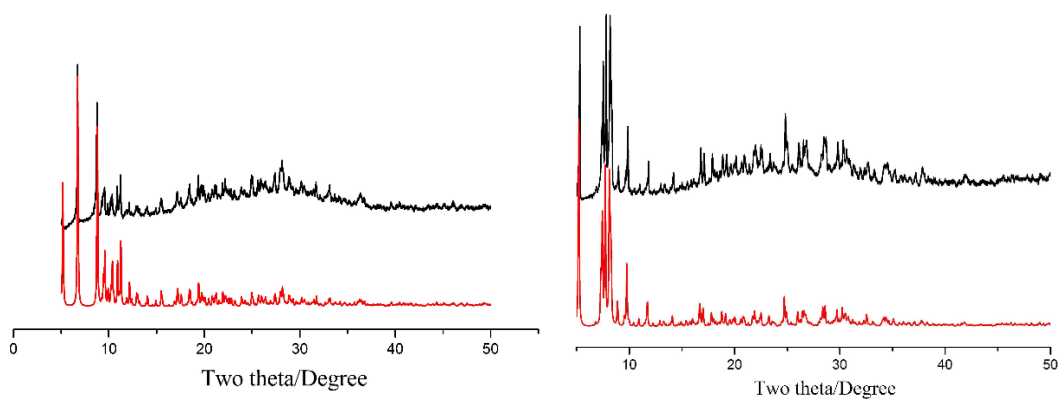

Figure S4. The experimental and simulated XRD patterns for **1** (left) and **2** (right).

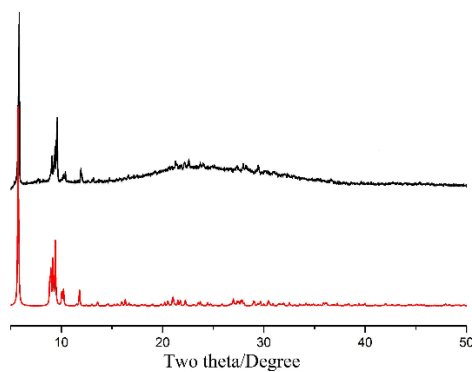

Figure S5. The experimental and simulated XRD patterns for compound **3**.

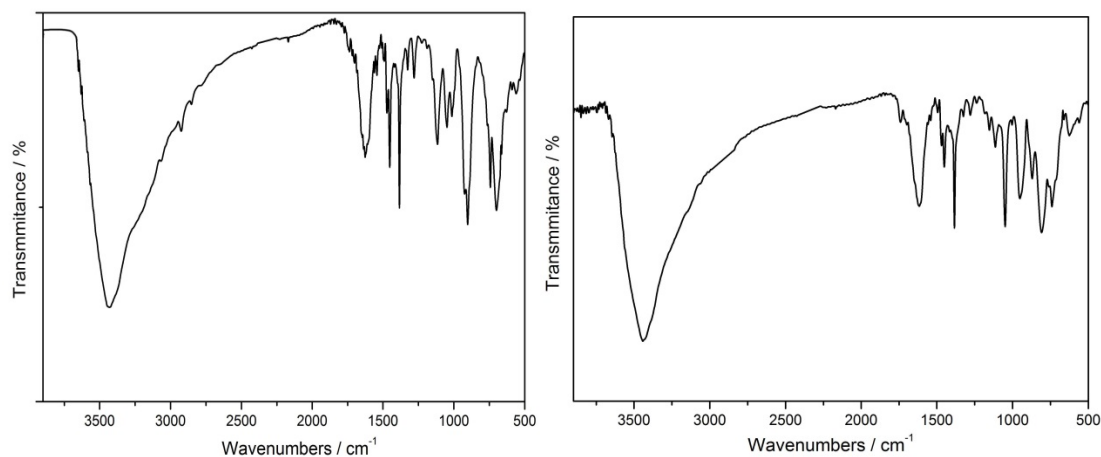

Figure S6. The IR of compound **1** (left) and **2** (right).

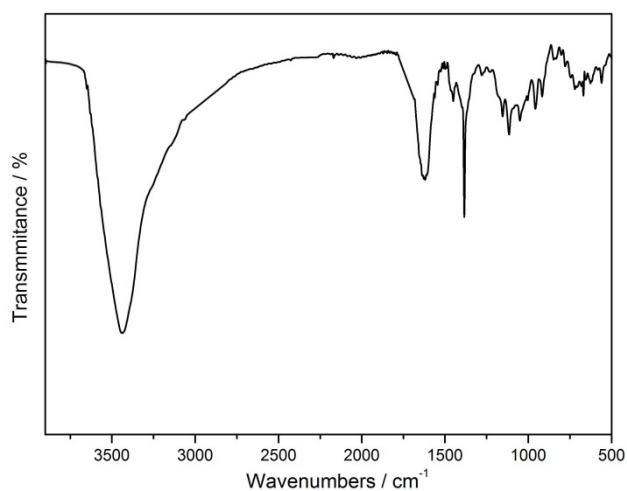

Figure S7. The IR of compound **3**.

Table S1. Selected bond lengths for compound **1** (Å).

|             |          |             |          |             |          |
|-------------|----------|-------------|----------|-------------|----------|
| Mo(1)-O(16) | 1.691(3) | P(1)-O(8)   | 1.531(3) | Ni(1)-O(1W) | 2.137(3) |
| Mo(1)-O(14) | 1.712(3) | P(1)-O(21)  | 1.532(3) | Ni(1)-N(14) | 2.201(4) |
| Mo(1)-O(13) | 1.933(3) | P(1)-O(17)  | 1.568(3) | Ni(2)-N(6)  | 2.012(4) |
| Mo(1)-O(5)  | 1.935(3) | P(2)-O(9)   | 1.505(4) | Ni(2)-O(10) | 2.054(3) |
| Mo(1)-O(8)  | 2.228(3) | P(2)-O(18)  | 1.519(3) | Ni(2)-N(2)  | 2.064(5) |
| Mo(1)-O(18) | 2.387(3) | P(2)-O(6)   | 1.535(4) | Ni(2)-N(4)  | 2.067(5) |
| Mo(2)-O(3)  | 1.703(4) | P(2)-O(20)  | 1.575(4) | Ni(2)-O(2W) | 2.152(4) |
| Mo(2)-O(22) | 1.700(4) | Mo(5)-O(23) | 1.694(3) | Ni(2)-N(7)  | 2.190(4) |
| Mo(2)-O(2)  | 1.906(3) | Mo(5)-O(10) | 1.732(3) | P(1)-O(12)  | 1.513(3) |
| Mo(2)-O(15) | 1.927(3) | Mo(5)-O(7)  | 1.886(3) | Ni(1)-N(9)  | 2.038(4) |
| Mo(2)-O(12) | 2.315(3) | Mo(5)-O(15) | 1.935(3) | Ni(1)-N(13) | 2.045(4) |
| Mo(2)-O(6)  | 2.389(3) | Mo(5)-O(6)  | 2.202(3) | Ni(1)-N(11) | 2.057(4) |
| Mo(3)-O(11) | 1.696(4) | Mo(5)-O(21) | 2.403(3) | Ni(1)-O(4)  | 2.060(3) |
| Mo(3)-O(4)  | 1.733(3) | Mo(4)-O(2)  | 1.926(3) | Mo(4)-O(19) | 1.703(4) |
| Mo(3)-O(5)  | 1.896(3) | Mo(4)-O(9)  | 2.288(3) | Mo(4)-O(1)  | 1.711(4) |
| Mo(3)-O(7)  | 1.929(3) | Mo(4)-O(8)  | 2.387(3) | Mo(4)-O(13) | 1.896(3) |

|             |          |             |          |             |          |
|-------------|----------|-------------|----------|-------------|----------|
| Mo(3)-O(11) | 1.696(4) | Mo(3)-O(18) | 2.360(3) | Mo(3)-O(21) | 2.297(3) |
|-------------|----------|-------------|----------|-------------|----------|

Table S2. Selected bond lengths for compound **2** (Å).

|             |          |              |          |              |          |
|-------------|----------|--------------|----------|--------------|----------|
| Mo(1)-O(7)  | 1.701(5) | Mo(10)-O(58) | 1.678(7) | Mo(19)-O(46) | 1.811(7) |
| Mo(1)-O(50) | 1.804(6) | Mo(10)-O(62) | 1.830(5) | Mo(19)-O(33) | 1.923(5) |
| Mo(1)-O(59) | 1.904(5) | Mo(10)-O(20) | 1.885(5) | Mo(19)-O(12) | 1.952(5) |
| Mo(1)-O(39) | 1.914(5) | Mo(10)-O(42) | 1.990(6) | Mo(19)-O(62) | 1.960(5) |
| Mo(1)-O(29) | 2.010(6) | Mo(10)-O(27) | 1.991(5) | Mo(19)-O(69) | 1.987(6) |
| Mo(1)-O(25) | 2.438(5) | Mo(10)-O(44) | 2.441(5) | Mo(19)-O(44) | 2.346(5) |
| Mo(2)-O(23) | 1.695(5) | Mo(11)-O(8)  | 1.675(6) | Mo(20)-O(65) | 1.689(5) |
| Mo(2)-O(80) | 1.815(5) | Mo(11)-O(13) | 1.860(5) | Mo(20)-O(42) | 1.828(7) |
| Mo(2)-O(69) | 1.827(5) | Mo(11)-O(55) | 1.890(5) | Mo(20)-O(60) | 1.923(6) |
| Mo(2)-O(20) | 2.000(5) | Mo(11)-O(5)  | 1.953(5) | Mo(20)-O(41) | 1.929(6) |
| Mo(2)-O(4)  | 2.006(5) | Mo(11)-O(34) | 1.968(5) | Mo(20)-O(66) | 1.970(5) |
| Mo(2)-O(44) | 2.427(5) | Mo(11)-O(24) | 2.438(5) | Mo(20)-O(10) | 2.419(5) |
| Mo(3)-O(1)  | 1.709(5) | Mo(12)-O(38) | 1.687(6) | Mo(21)-O(40) | 1.726(7) |
| Mo(3)-O(76) | 1.855(5) | Mo(12)-O(29) | 1.861(5) | Mo(21)-O(35) | 1.878(7) |
| Mo(3)-O(15) | 1.893(6) | Mo(12)-O(19) | 1.896(5) | Mo(21)-O(15) | 1.938(5) |
| Mo(3)-O(57) | 1.905(6) | Mo(12)-O(70) | 1.923(7) | Mo(21)-O(47) | 1.956(7) |
| Mo(3)-O(67) | 1.968(5) | Mo(12)-O(43) | 1.940(5) | Mo(21)-O(54) | 1.961(5) |
| Mo(3)-O(53) | 2.462(5) | Mo(12)-O(25) | 2.461(6) | Mo(21)-O(53) | 2.459(6) |
| Mo(4)-O(36) | 1.701(7) | Mo(13)-O(28) | 1.700(7) | Mo(22)-O(74) | 1.699(7) |
| Mo(4)-O(57) | 1.892(6) | Mo(13)-O(63) | 1.895(7) | Mo(22)-O(33) | 1.870(5) |
| Mo(4)-O(31) | 1.902(5) | Mo(13)-O(70) | 1.906(7) | Mo(22)-O(6)  | 1.917(5) |
| Mo(4)-O(59) | 1.915(5) | Mo(13)-O(78) | 1.913(5) | Mo(22)-O(60) | 1.947(5) |
| Mo(4)-O(19) | 1.935(6) | Mo(13)-O(1A) | 1.947(7) | Mo(22)-O(75) | 1.969(5) |
| Mo(4)-O(25) | 2.451(5) | Mo(13)-O(49) | 2.402(5) | Mo(22)-O(10) | 2.494(6) |
| Mo(5)-O(11) | 1.683(5) | Mo(14)-O(86) | 1.700(7) | Mo(23)-O(79) | 1.809(7) |
| Mo(5)-O(34) | 1.863(5) | Mo(14)-O(47) | 1.843(7) | Mo(23)-O(45) | 1.932(5) |
| Mo(5)-O(14) | 1.865(6) | Mo(14)-O(64) | 1.927(7) | Mo(23)-O(55) | 1.936(5) |
| Mo(5)-O(18) | 1.947(5) | Mo(14)-O(68) | 1.934(5) | Mo(23)-O(80) | 1.971(5) |
| Mo(5)-O(71) | 1.989(6) | Mo(14)-O(1A) | 2.040(7) | Mo(23)-O(17) | 1.998(5) |
| Mo(5)-O(21) | 2.395(5) | Mo(14)-O(49) | 2.410(7) | Mo(23)-O(24) | 2.373(5) |
| Mo(6)-O(9)  | 1.703(6) | Mo(15)-O(51) | 1.667(7) | Mo(24)-O(61) | 1.810(7) |
| Mo(6)-O(12) | 1.827(5) | Mo(15)-O(43) | 1.871(5) | Mo(24)-O(35) | 1.932(6) |
| Mo(6)-O(45) | 1.893(6) | Mo(15)-O(77) | 1.879(7) | Mo(24)-O(26) | 1.933(5) |
| Mo(6)-O(6)  | 1.934(5) | Mo(15)-O(78) | 1.918(5) | Mo(24)-O(76) | 1.972(5) |
| Mo(6)-O(13) | 1.968(5) | Mo(15)-O(87) | 2.008(7) | Mo(24)-O(50) | 1.995(6) |
| Mo(6)-O(24) | 2.429(5) | Mo(15)-O(32) | 2.467(5) | Mo(24)-O(53) | 2.390(5) |
| Mo(7)-O(22) | 1.688(7) | Mo(16)-O(37) | 1.647(7) | P(1)-O(10)   | 1.533(6) |
| Mo(7)-O(5)  | 1.900(5) | Mo(16)-O(26) | 1.846(5) | P(1)-O(21)   | 1.533(6) |
| Mo(7)-O(71) | 1.909(6) | Mo(16)-O(68) | 1.920(7) | P(1)-O(44)   | 1.535(5) |
| Mo(7)-O(75) | 1.915(5) | Mo(16)-O(39) | 1.932(6) | P(1)-O(24)   | 1.535(5) |
| Mo(7)-O(66) | 1.922(5) | Mo(16)-O(63) | 1.997(7) | P(2)-O(25)   | 1.512(6) |
| Mo(7)-O(10) | 2.442(5) | Mo(16)-O(49) | 2.463(5) | P(2)-O(53)   | 1.511(6) |

|             |          |              |           |             |          |
|-------------|----------|--------------|-----------|-------------|----------|
| Mo(8)-O(3)  | 1.709(6) | Mo(17)-O(2)  | 1.704(7)  | P(2)-O(32)  | 1.512(5) |
| Mo(8)-O(17) | 1.789(5) | Mo(17)-O(31) | 1.884(5)  | P(2)-O(49)  | 1.548(5) |
| Mo(8)-O(4)  | 1.838(5) | Mo(17)-O(67) | 1.899(6)  | Ni(1)-N(19) | 2.000(8) |
| Mo(8)-O(14) | 1.994(5) | Mo(17)-O(48) | 1.921(7)  | Ni(1)-N(16) | 2.014(8) |
| Mo(8)-O(16) | 2.028(5) | Mo(17)-O(77) | 1.995(7)  | Ni(1)-N(18) | 2.026(7) |
| Mo(8)-O(21) | 2.506(6) | Mo(17)-O(32) | 2.461(5)  | Ni(1)-O(9)  | 2.057(5) |
| Mo(9)-O(30) | 1.695(5) | Mo(18)-O(73) | 1.690(6)  | Ni(1)-O(4W) | 2.131(7) |
| Mo(9)-O(16) | 1.844(6) | Mo(18)-O(54) | 1.841(5)  | Ni(1)-N(21) | 2.166(7) |
| Mo(9)-O(27) | 1.842(5) | Mo(18)-O(64) | 1.886(7)  | Ni(2)-N(2)  | 2.011(7) |
| Mo(9)-O(18) | 1.957(5) | Mo(18)-O(48) | 1.921(7)  | Ni(2)-N(6)  | 2.013(7) |
| Mo(9)-O(41) | 2.057(6) | Mo(18)-O(87) | 2.027(7)  | Ni(2)-N(3)  | 2.015(8) |
| Mo(9)-O(21) | 2.428(5) | Mo(18)-O(32) | 2.447(5)  | Ni(2)-O(1W) | 2.151(7) |
| Ni(4)-N(23) | 2.037(8) | Ni(3)-O(7)   | 2.110(6)  | Ni(2)-O(1)  | 2.136(5) |
| Ni(4)-N(26) | 2.051(8) | Ni(3)-O(2W)  | 2.145(7)  | Ni(2)-N(3A) | 2.187(7) |
| Ni(4)-O(23) | 2.075(5) | Ni(3)-N(14)  | 2.166(10) | Ni(3)-N(9)  | 2.036(8) |
| Ni(4)-O(3W) | 2.145(7) | Ni(3)-N(11)  | 2.031(8)  | Ni(3)-N(13) | 2.032(8) |
| Ni(4)-N(28) | 2.153(9) | Ni(4)-N(25)  | 2.010(8)  |             |          |

Table S3. Selected bond lengths for compound **3** (Å).

|               |          |               |          |               |          |
|---------------|----------|---------------|----------|---------------|----------|
| Mo(1)-O(3)    | 1.674(4) | Mo(2)-O(1)    | 2.365(4) | Mo(4)-O(7)    | 1.688(5) |
| Mo(1)-O(10)   | 1.752(4) | Mo(2)-O(12)   | 2.312(4) | Mo(4)-O(11)   | 1.921(4) |
| Mo(1)-O(6)_a  | 1.940(4) | Mo(3)-O(12)_a | 2.225(4) | Mo(4)-O(8)_a  | 1.925(4) |
| Mo(1)-O(1)    | 1.919(4) | Mo(3)-O(6)    | 2.393(4) | Mo(4)-O(10)_a | 2.269(4) |
| Mo(1)-O(12)_a | 2.205(4) | Mo(3)-O(9)    | 1.724(4) | Ni(1)-N(5)    | 2.066(5) |
| Mo(1)-O(12)   | 2.396(4) | Mo(3)-O(11)   | 1.878(4) | Ni(1)-O(5)    | 2.183(4) |
| Mo(2)-O(4)    | 1.685(4) | Mo(3)-O(1)    | 1.991(4) | Ni(1)-N(7)    | 2.191(4) |
| Mo(2)-O(5)    | 1.708(4) | Mo(3)-O(2)    | 1.684(5) | Ni(1)-N(2)    | 2.007(5) |
| Mo(2)-O(8)    | 1.910(4) | Mo(4)-O(12)_a | 2.481(4) | Ni(1)-N(4)    | 2.043(5) |
| Mo(2)-O(6)    | 1.956(4) | Mo(4)-O(13)   | 1.688(5) | Ni(1)-O(9)    | 2.031(4) |

Symmetry transformations used to generate equivalent atoms:

#1 -x+2,-y,-z

Table S4. Distances and angles [Å, °] of hydrogen bonds for compound **1**.

| D-H...A      | d(D-H) | d(H...A) | d(D...A)  | ∠D-H...A |
|--------------|--------|----------|-----------|----------|
| O1W-H...O18  | 0.88   | 2.50     | 2.935(5)  | 111      |
| O1W-H...O20  | 0.88   | 2.44     | 3.308(5)  | 171      |
| O1W-HA...O14 | 0.88   | 1.96     | 2.828(5)  | 169      |
| O2W-HB...O6W | 0.85   | 2.4      | 3.066(15) | 135      |
| O2W-HC...O4W | 0.85   | 2.28     | 3.119(10) | 169      |

---

|                     |         |         |           |           |
|---------------------|---------|---------|-----------|-----------|
| N1-HV···O2          | 0.86    | 2.32    | 3.093(8)  | 149       |
| N1-HV···O19         | 0.86    | 2.33    | 2.981(8)  | 133       |
| N3-HW···O12         | 0.86    | 2.27    | 3.092(7)  | 159       |
| N5-HX···O5W         | 0.86    | 2.03    | 2.853(15) | 161       |
| N5-HX···O8WA        | 0.86    | 2.13    | 2.93(3)   | 154       |
| N8-HY···O8WC        | 0.86    | 1.97    | 2.822(15) | 172       |
| N10-HZ···O9W        | 0.86    | 2.06    | 2.878(6)  | 158       |
| N12-H0AA···O7W      | 0.86    | 1.89    | 2.737(15) | 169       |
| O3W-H3WA···O10W     | 0.89(2) | 2.16(3) | 2.811(9)  | 130(2)    |
| O3W-H3WA···O20      | 0.89(2) | 2.41(3) | 2.724(7)  | 101(2)    |
| O3W-H3WB···O20      | 0.85(3) | 2.42(3) | 2.724(7)  | 101.6(18) |
| O4W-H4WA···O12      | 0.85    | 2.06    | 2.847(8)  | 154       |
| O4W-<br>H4WB···O8WC | 0.85    | 2.23    | 2.86(2)   | 131       |
| O6W-H6WA···O11W     | 0.85    | 2.15    | 2.98(2)   | 166       |
| O6W-<br>H6WB···O8WA | 0.85    | 2.52    | 3.32(3)   | 157       |
| O6W-H6WB···O5W      | 0.85    | 2.11    | 2.947(17) | 170       |
| O9W-H1CA···O11W     | 0.85    | 1.99    | 2.76(2)   | 151       |
| O9W-H1CA···O12W     | 0.85    | 2.06    | 2.87(2)   | 159       |
| O9W-H2CA···O9       | 0.85    | 1.93    | 2.744(5)  | 160       |
| O10W-H3CA···O22     | 0.85    | 2.11    | 2.813(7)  | 139       |
| O10W-H4CA···O17     | 0.85    | 1.82    | 2.663(7)  | 173       |
| C44-HD···O9         | 0.97    | 2.5     | 3.277(7)  | 137       |
| C46-HF···O14        | 0.97    | 2.59    | 3.484(7)  | 153       |
| C7-HJ···O3          | 0.93    | 2.57    | 3.331(8)  | 139       |
| C10-HM···O23        | 0.93    | 2.43    | 3.121(7)  | 131       |
| C20-HR···O22        | 0.97    | 2.55    | 3.501(8)  | 166       |
| C22-HT···O17        | 0.97    | 2.39    | 3.245(8)  | 147       |

---

|                |      |      |          |     |
|----------------|------|------|----------|-----|
| C22-HU···O1    | 0.97 | 2.42 | 3.135(8) | 130 |
| C1-H1AA···O1   | 0.93 | 2.57 | 3.446(9) | 156 |
| C4-H4AA···O11  | 0.93 | 2.55 | 3.304(7) | 139 |
| C25-H7AA···O7  | 0.93 | 2.35 | 3.152(7) | 144 |
| C32-H2BA···O20 | 0.93 | 2.51 | 3.349(8) | 150 |
| C34-H4BA···O14 | 0.93 | 2.49 | 3.244(7) | 138 |

Table S5. Distances and angles [ $\text{\AA}$ ,  $^\circ$ ] of hydrogen bonds for compound **2**.

| <b>D–H···A</b> | <b>d(D–H)</b> | <b>d(H···A)</b> | <b>d(D···A)</b> | <b><math>\angle</math>D–H···A</b> |
|----------------|---------------|-----------------|-----------------|-----------------------------------|
| N20-H···O11    | 0.86          | 2.5             | 2.960(10)       | 114                               |
| N20-H···O71    | 0.86          | 2.17            | 3.012(9)        | 168                               |
| N5-HA···O30    | 0.86          | 2.58            | 2.982(9)        | 110                               |
| N5-HA···O41    | 0.86          | 2.15            | 3.008(9)        | 174                               |
| N4-HB···O29    | 0.86          | 2.44            | 3.228(10)       | 153                               |
| N4-HB···O39    | 0.86          | 2.47            | 3.132(10)       | 134                               |
| N27-HD···O75   | 0.86          | 2.17            | 2.988(11)       | 159                               |
| N17-HE···O15   | 0.86          | 2.5             | 3.321(9)        | 161                               |
| N17-HE···O67   | 0.86          | 2.51            | 3.156(10)       | 133                               |
| N12-HJ···O20   | 0.86          | 2.14            | 2.946(9)        | 157                               |
| N10-HN···O60   | 0.86          | 2.48            | 3.242(12)       | 148                               |
| N1-HW···O35    | 0.86          | 2.56            | 3.406(10)       | 168                               |
| N24-HX···O55   | 0.86          | 2.07            | 2.863(11)       | 154                               |
| N22-H1AA···O87 | 0.86          | 2.28            | 3.009(12)       | 143                               |
| N8-H5AA···O1A  | 0.86          | 2.11            | 2.863(12)       | 145                               |
| N15-H5BA···O19 | 0.86          | 2.11            | 2.954(12)       | 167                               |
| C18-HI···O15   | 0.93          | 2.55            | 3.331(11)       | 142                               |
| C62-HK···O34   | 0.93          | 2.55            | 3.426(11)       | 158                               |
| C15-HP···O27   | 0.93          | 2.54            | 3.417(11)       | 156                               |
| C39-H4AA···O29 | 0.93          | 2.59            | 3.431(13)       | 151                               |
| C69-H7AA···O54 | 0.97          | 2.58            | 3.226(11)       | 124                               |

|                |      |      |           |     |
|----------------|------|------|-----------|-----|
| C69-H7AA···O73 | 0.97 | 2.55 | 3.473(12) | 160 |
| C19-H1BA···O86 | 0.97 | 2.52 | 3.435(12) | 157 |
| C67-H4BA···O38 | 0.97 | 2.5  | 3.414(12) | 158 |
| C9B-H7BA···O11 | 0.97 | 2.48 | 3.282(14) | 140 |
| C9B-H8BA···O51 | 0.97 | 2.42 | 3.375(13) | 167 |
| C45-H2CA···O28 | 0.97 | 2.51 | 3.429(15) | 157 |
| C93-H8CA···O14 | 0.97 | 2.25 | 3.153(13) | 154 |
| C51-H1EA···O36 | 0.93 | 2.43 | 3.231(16) | 145 |
| C43-H2EA···O16 | 0.97 | 2.27 | 3.211(13) | 162 |
| C31-H3FA···O62 | 0.93 | 2.26 | 3.163(14) | 163 |
| C73-H6FA···O13 | 0.93 | 2.24 | 3.167(13) | 170 |

Table S6. Distances and angles [ $\text{\AA}$ ,  $^\circ$ ] of hydrogen bonds for compound **3**.

| <b>D-H···A</b>     | <b>d(D-H)</b> | <b>d(H···A)</b> | <b>d(D···A)</b> | <b><math>\angle</math>D-H···A</b> |
|--------------------|---------------|-----------------|-----------------|-----------------------------------|
| O1W-H1WA···O10     | 0.85          | 2.28            | 3.071(8)        | 154                               |
| N1-H1B···O2W       | 0.86          | 2.01            | 2.857(8)        | 169                               |
| O1W-<br>H1WB···O4W | 0.86          | 2.49            | 3.189(19)       | 140                               |
| O2W-<br>H2WA···O5W | 0.89          | 2.49            | 3.02(2)         | 119                               |
| N3-H3B···O7        | 0.86          | 2.00            | 2.858(6)        | 176                               |
| O2W-<br>H2WB···O5W | 0.90          | 2.52            | 3.02            | 116                               |
| O3W-H3WA···O2      | 0.93          | 2.36            | 2.977(11)       | 123                               |
| O3W-H3WB···O2      | 0.94          | 2.37            | 2.977(11)       | 122                               |
| N6-H6B···O8        | 0.86          | 1.92            | 2.750(6)        | 162                               |
| C19-H19B···O4      | 0.97          | 2.51            | 3.056(8)        | 116                               |
| C22-H22B···O13     | 0.97          | 2.55            | 3.501(8)        | 168                               |

Table S7. BVS values of oxygen atoms in compound **1**.



---

|     |        |     |        |
|-----|--------|-----|--------|
| O1  | 1.5061 | O13 | 2.2035 |
| O2  | 2.2177 | O14 | 1.5012 |
| O3  | 1.5513 | O15 | 2.1535 |
| O4  | 1.8271 | O16 | 1.5421 |
| O5  | 2.2031 | O17 | 1.1846 |
| O6  | 2.3722 | O18 | 2.2013 |
| O7  | 2.2185 | O19 | 1.5324 |
| O8  | 2.3554 | O20 | 1.2852 |
| O9  | 1.8939 | O21 | 2.2312 |
| O10 | 1.8189 | O22 | 1.5437 |
| O11 | 1.5401 | O23 | 1.5149 |
| O12 | 1.8171 |     |        |

---
